# Supplementary material for: The health system’s response strategies to the effects of climate change extreme weather events in Malawi. A policy analysis
Source: Research Square preprint supplement (doi:10.21203/rs.3.rs-7128239/v1), 2025-08-07
Supplement: Supplementary file 1 [file 7c023ad3218f607da2703b94.docx]

**Table 1**: Selected policies, Implementation years, and climate change priority areas

**___________________________________________________________________________**

**Policy name Operation years Climate change priority areas**

Health Sector Strategic Plan 2023-2030 Address health and health

III delivery effects of climate change

National Environmental 2018-2024 Emergencies, Climate Change and

Health Policy human health

National Population Policy 2023-2028 Climate Change Adaptation and

resilience
