# Supplementary material for: The health system’s response strategies to the effects of climate change extreme weather events in Malawi. A policy analysis
Source: Research Square preprint supplement (doi:10.21203/rs.3.rs-7128239/v1), 2025-08-07
Supplement: Supplementary file 2 [file f3b707dada485f52d1026005.xlsx]

## Sheet: Sheet1
POLICY ANALYSIS DATA EXTRACTION FORM
POLICY NAME	CLIMATE CHANGE THEME	CONTENT	CONTEXT	PROCESS	ACTORS
Malawi Health Sector Strategic Plan III 2023-2030	To address health and health delivery effects of climate change	- Acknowledges climate change impacts on health systems, disease transmission, food/water scarcity, and health infrastructure - Calls for collaborative research, evaluation, policy development, and implementation - Aims to improve monitoring systems and healthcare providers' capacity to use data for priority setting	To be guided and operate within legal frame work of Malawi including constitution, health regulatory bodies, and Malawi 2063T. International policies include Sustainable Development Goals, Parish Declaration on Aid Effectiveness 2005, Astana Declaration on PHC	Consulatation with District Health Offices, other Government Ministries, Departments and Agencies, Regulatory Bodies, International and Local Non-Governmental Organisations, Civil Society Organisations, Patient groups, Donors, private sector actors, UN agencies, Members of Parliament, academic institutions, and members of the general public.	Include Ministry of Health Directorates, District Health Offices, other Government Ministries, Departments and Agencies, Regulatory Bodies, International and Local Non-Governmental Organisations, Civil Society Organisations, Patient groups, Donors, private sector actors, UN agencies, Members of Parliament, academic institutions, and members of the general public.
National Environmental Health Policy document for Malawi	Emergencies, Climate Change and Human Health."	To ensure that there are strong and resilient public health systemsand programes to respond to emergencies and disasaters, and address effects of climate change on human health	In line with the Malawi Growth and Development Strategy (MGDS III) Health Sector, World Health Organization, Libreville Declaration on Health and Environment (2008), Ethekwini Declaration on Hygiene and Sanitation (2008), Africa Health Strategy of the African Union (2007-2015), UN Millennium Declaration and subsequent Millennium Development Goals (2000), Rio Declaration on Environment and Develop…	Process involved consultations with Government Officials, Civil Society, Academia, NGOs, Experts and Development Partners	Include government, non-governmental organizations and civil society, the private sector, academia, development partners, local communities and other marginalized groups.
National Population Policy of Malawi	Climate change adaptation and resilience	Enhance mainstreaming and integration of climate change adaptation and resilience in Sexual Reproductive Health and Rights, population and development programming.	To be implemented in line with the Malawi 2063 Vision. The Policy is also aligned to global declarations and commitments such as the African Union (AU) Agenda 2063, the Sustainable Development Goals (SDGs), Family Planning 2030, and International Conference on Population and Development (ICPD) Plan of Action.	Consultative process with religious and traditional leaders, Members of Parliament, development partners, members of the academia, the private sector, Civil Society Organizations, young people, District Councils, and officials from various Government Ministries, Departments, and Agencies.	Ministry of Health, United Nations Population Fund (UNFPA), the United States Agency for International Development (USAID), the African Institute for Development Policy (AFIDEP) through institutional core funds and USAID funded BUILD Project and the UKAid Foreign, Commonwealth & Development Office (FCDO) funded WISH2ACTION
